# Supplementary material for: Self-Harm Among 17-Year-Old Adolescents With/Without Disabilities in the United Kingdom
Source: Atypon-hosted journal article supplement (doi:10.1027/0227-5910/a000951), 2024-03-15
Supplement: 0227-5910_a000951_esm1.pdf [file 0227-5910_a000951_esm1.pdf]

## Electronic Supplementary Material 1 (ESM 1)

### Disability Questions

1. *Do you have any physical or mental health conditions or illnesses lasting or expected to last 12 months or more?*
2. *Does this/Do any of these condition(s) or illness(es) affect you in any of the following areas?*
  - a. *Vision (for example blindness or partial sight)*
  - b. *Hearing (for example deafness or partial hearing)*
  - c. *Mobility (for example walking short distances or climbing stairs)*
  - d. *Dexterity (for example lifting and carrying objects, using a keyboard)*
  - e. *Learning or understanding or concentrating*
  - f. *Memory*
  - g. *Mental health*
  - h. *Stamina or breathing or fatigue*
  - i. *Socially or behaviourally (for example associated with autism, attention deficit disorder or Asperger's Syndrome)*
  - j. *Other*
3. *Does this/Do any of these condition(s) or illness(es) reduce your ability to carry out day-to-day activities? Would you say... (a lot, a little, not at all)*

Note: Respondents were allowed to select as many categories as necessary in response to Q2.

### Sex

Information on sex was collected at early Waves in MCS. This was recoded into a binary variable (male/female) No data were missing for Wave 7 respondents for whom valid disability and self-harm data were available.

### Ethnicity

Detailed information on ethnicity was collected at multiple Waves in MCS. Given the very small numbers in some cells, this was recoded into a binary variable (ethnic minority), with 'white' coded as 0 and all other response options coded as 1. No data were missing for Wave 7 respondents for whom valid disability and self-harm data were available.

### Sexual Orientation

Sexual orientation was primarily derived from responses to the following question.

- *Which of the following options best describes how you currently think of yourself?*
  - *Completely heterosexual / straight*
  - *Mainly heterosexual / straight*
  - *Bisexual*
  - *Mainly gay or lesbian*
  - *Completely gay or lesbian*
  - *Other*

Given the very small numbers in some cells, this was recoded into a binary variable (sexual minority) with 'completely heterosexual / straight' coded as 0 and all other response options coded as 1.

For 10 participants these data were missing, but they did respond to a question on sexual attraction.

- *I have felt sexually attracted...*
  - *Only to opposite sex*
  - *More often to opposite sex and at least once to same sex*
  - *About equally often to opposite sex and at least once to same sex*
  - *More often to same sex and at least once to opposite sex*
  - *Only ever to same sex*
  - *I have never felt sexually attracted to anyone at all*

For the participants with missing data sexual minority was coded as 0 for the response 'only to opposite sex' and coded as 1 for all other response options. Data were missing for 0.2% of Wave 7 respondents for whom valid disability and self-harm data were available.

### Family Poverty

Family income poverty was assessed at Waves 1-4 of MCS (cohort member ages 9 months, 3 years, 5 years and 7 years). In line with UK government approach to defining income poverty, poverty was defined as having a combined household equivalized income (before housing costs) of less than 60% of the weighted sample median. The modified OECD equivalization scale was used to adjust income considering household composition. Data from all available Waves were combined to create a binary variable: not exposed to income poverty in any Wave vs. exposed to income poverty in one or more Waves). Data were missing for <0.1% of Wave 7 respondents for whom valid disability and self-harm data were available.

### Bullied at Ages 7, 11 or 14

Self-report data on exposure to bullying was collected from the children/adolescents at ages 7 (Wave 4), 11 (Wave 5) and 14 (Wave 6) years. From these we created a binary variable (never bullied vs. bullied at one or more Wave). Data were missing for 0.2% of Wave 7 respondents for whom valid disability and self-harm data were available.

### Depression at age 14

Short-Form Mood and Feelings Questionnaire, a 13-item questionnaire designed to screen for depression in children and adolescents, was administered at age 14.(1) Two studies have suggested using a cut-off of eight or higher for major depression.(1, 2) Data were missing for 3.1% of Wave 7 respondents for whom valid disability and self-harm data were available.

### References

- [1] Angold A, Costello EJ, Messer SC, et al. Development of a short questionnaire for use in epidemiological studies of depression in children and adolescents. *International Journal of Methods in Psychiatric Research* 1995;5:237-249.
- [2] Thapar A, McGuffin P. Validity of the shortened Mood and Feelings Questionnaire in a community sample of children and adolescents: A preliminary research note. *Psychiatry Research* 1998;81:259-268.

| Supplementary Table E1: Adjusted prevalence rate ratios for association of specific functional limitations associated with disability and specific self-harming acts undertaken in the last year |                        |                        |                         |                              |                        |                              |
|--------------------------------------------------------------------------------------------------------------------------------------------------------------------------------------------------|------------------------|------------------------|-------------------------|------------------------------|------------------------|------------------------------|
| Functional limitation associated with disability                                                                                                                                                 | Cut or stabbed self    | Burned self            | Bruised or pinched self | Taken an overdose of tablets | Pulled out hair        | Hurt yourself some other way |
| Mental health                                                                                                                                                                                    | 3.79***<br>(2.80-5.12) | 4.22***<br>(2.54-7.01) | 3.04***<br>(2.36-3.91)  | 9.37***<br>(6.26-14.03)      | 3.54***<br>(2.50-5.00) | 4.32***<br>(3.05-6.13)       |
| Learning/understanding                                                                                                                                                                           | 2.86***<br>(2.25-3.63) | 3.73***<br>(2.47-5.64) | 2.73***<br>(2.24-3.35)  | 4.73***<br>(3.26-6.88)       | 3.52***<br>(2.62-4.74) | 4.44***<br>(3.07-6.42)       |
| Memory                                                                                                                                                                                           | 3.00***<br>(2.21-4.06) | 3.17***<br>(1.86-5.41) | 2.67***<br>(2.05-3.50)  | 4.60***<br>(2.62-8.10)       | 3.32***<br>(2.20-5.03) | 4.22***<br>(2.66-6.69)       |
| Stamina                                                                                                                                                                                          | 2.35***<br>(1.71-3.22) | 2.38**<br>(1.31-4.35)  | 1.93***<br>(1.40-2.67)  | 3.53***<br>(2.07-6.02)       | 2.82***<br>(1.95-4.09) | 3.20***<br>(2.02-5.06)       |
| Social/behavioural                                                                                                                                                                               | 1.91*<br>(1.03-3.51)   | 2.18*<br>(1.12-4.25)   | 1.75*<br>(1.09-2.82)    | 3.48**<br>(1.71-7.08)        | 1.80<br>(0.94-3.44)    | 2.97***<br>(1.73-5.09)       |
| Dexterity                                                                                                                                                                                        | 1.16<br>(0.58-2.00)    | 0.84<br>(0.25-2.81)    | 1.38<br>(0.84-2.25)     | 1.38<br>(0.47-4.03)          | 1.89<br>(0.98-3.63)    | 1.23<br>(0.34-4.45)          |
| Hearing                                                                                                                                                                                          | 1.29<br>(0.51-3.27)    | 2.53<br>(0.96-6.66)    | 1.81<br>(0.98-3.32)     | 3.00<br>(0.86-10.53)         | 1.56<br>(0.66-3.68)    | 3.04*<br>(1.24-7.43)         |
| Vision                                                                                                                                                                                           | 1.39<br>(0.59-4.64)    | 0.54<br>(0.12-2.47)    | 1.47<br>(0.53-4.11)     | 1.43<br>(0.34-5.88)          | 1.75<br>(0.50-6.14)    | 1.22<br>(0.36-4.07)          |
| Mobility                                                                                                                                                                                         | 1.27<br>(0.62-2.59)    | 0.99<br>(0.40-2.42)    | 1.07<br>(0.58-1.98)     | 1.31<br>(0.54-3.16)          | 1.18<br>(0.54-2.54)    | 1.31<br>(0.57-3.01)          |
| Notes:<br>* p<0.05, ** p<0.01, *** p<0.001                                                                                                                                                       |                        |                        |                         |                              |                        |                              |

| Supplementary Table E2: Unadjusted bivariate prevalence rate ratios of potential risk factors for self-harm among adolescents with disabilities |                                                                 |                                   |                                                                  |                                                             |                                                                                  |                                                                        |                                                                   |
|-------------------------------------------------------------------------------------------------------------------------------------------------|-----------------------------------------------------------------|-----------------------------------|------------------------------------------------------------------|-------------------------------------------------------------|----------------------------------------------------------------------------------|------------------------------------------------------------------------|-------------------------------------------------------------------|
|                                                                                                                                                 | More limiting disability (reference = less limiting disability) | Female sex (reference = male sex) | Other sexual identify (reference = heterosexual sexual identity) | Minority ethnic status (reference = majority ethnic status) | Family income poverty at age 9 months, 3, 5 or 7 years (reference = no exposure) | Adolescent bullied at ages 7, 11 or 14 years (reference = no exposure) | Adolescent at risk of depression at age 14 (reference = low risk) |
| Ever hurt themselves on purpose in an attempt to end life:                                                                                      | 1.17 (0.79-1.71)                                                | 1.99** (1.34-2.95)                | 1.79** (1.23-2.60)                                               | 0.66 (0.40-1.10)                                            | 1.71** (1.20-2.44)                                                               | 1.38 (0.93-2.06)                                                       | 3.40*** (2.39-4.79)                                               |
| Participation in specific self-harming acts (including non-suicidal self-harm) In the last year ...                                             |                                                                 |                                   |                                                                  |                                                             |                                                                                  |                                                                        |                                                                   |
| Taken an overdose                                                                                                                               | 1.35 (0.80-2.25)                                                | 2.35** (1.37-4.08)                | 1.71* (1.09-2.69)                                                | 0.95 (0.55-1.65)                                            | 1.61* (1.01-2.57)                                                                | 1.97** (1.22-3.20)                                                     | 3.51*** (2.10-5.89)                                               |
| Cut or stabbed self                                                                                                                             | 1.14 (0.79-1.64)                                                | 2.07*** (1.45-2.96)               | 2.13*** (1.54-2.94)                                              | 0.82 (0.53-1.27)                                            | 0.85 (0.64-1.10)                                                                 | 1.25 (0.89-1.73)                                                       | 2.54*** (1.91-3.39)                                               |
| Burned self                                                                                                                                     | 1.68* (1.01-2.80)                                               | 1.65* (1.07-2.57)                 | 2.02** (1.31-3.12)                                               | 0.95 (0.51-1.78)                                            | 0.96 (0.64-1.45)                                                                 | 1.61* (1.03-2.53)                                                      | 3.37*** (2.22-5.10)                                               |
| Bruised or pinched self                                                                                                                         | 1.30 (0.89-1.90)                                                | 1.81** (1.29-2.58)                | 1.99*** (1.43-2.76)                                              | 0.61* (0.39-0.93)                                           | 0.87 (0.65-1.15)                                                                 | 1.32 (0.94-1.89)                                                       | 2.06*** (1.61-2.62)                                               |
| Pulled out hair                                                                                                                                 | 1.50 (0.98-2.30)                                                | 1.99** (1.28-3.11)                | 1.66** (1.14-2.49)                                               | 0.46* (0.24-0.85)                                           | 0.86 (0.61-1.20)                                                                 | 1.32 (0.88-1.97)                                                       | 2.79*** (1.91-4.09)                                               |
| Hurt self some other way                                                                                                                        | 1.82* (1.10-2.99)                                               | 1.51 (0.94-2.47)                  | 2.05** (1.28-3.28)                                               | 1.10 (0.65-1.83)                                            | 0.78 (0.50-1.18)                                                                 | 1.53 (0.92-2.48)                                                       | 2.19*** (1.47-3.24)                                               |
| Notes: * p<0.05, ** p<0.01, *** p<0.001                                                                                                         |                                                                 |                                   |                                                                  |                                                             |                                                                                  |                                                                        |                                                                   |

| Supplementary Table E3: Unadjusted bivariate prevalence rate ratios of potential risk factors for self-harm among adolescents without disabilities |                                      |                                                                     |                                                                |                                                                                  |                                                                        |                                                                   |
|----------------------------------------------------------------------------------------------------------------------------------------------------|--------------------------------------|---------------------------------------------------------------------|----------------------------------------------------------------|----------------------------------------------------------------------------------|------------------------------------------------------------------------|-------------------------------------------------------------------|
|                                                                                                                                                    | Female sex<br>(reference = male sex) | Other sexual identify<br>(reference = heterosexual sexual identity) | Minority ethnic status<br>(reference = majority ethnic status) | Family income poverty at age 9 months, 3, 5 or 7 years (reference = no exposure) | Adolescent bullied at ages 7, 11 or 14 years (reference = no exposure) | Adolescent at risk of depression at age 14 (reference = low risk) |
| Ever hurt themselves on purpose in an attempt to end life:                                                                                         | 2.42*** (1.74-3.36)                  | 3.54*** (2.59-4.83)                                                 | 1.02 (0.60-1.73)                                               | 1.78*** (1.29-2.44)                                                              | 2.14*** (1.61-2.84)                                                    | 4.03*** (2.90-5.61)                                               |
| Participation in specific self-harming acts (including non-suicidal self-harm) In the last year ...                                                |                                      |                                                                     |                                                                |                                                                                  |                                                                        |                                                                   |
| Taken an overdose                                                                                                                                  | 2.08* (1.17-3.70)                    | 2.39** (1.36-4.21)                                                  | 1.19 (0.55-2.60)                                               | 1.34 (0.68-2.64)                                                                 | 1.97* (1.12-3.44)                                                      | 3.55*** (1.78-7.09)                                               |
| Cut or stabbed self                                                                                                                                | 1.90*** (1.39-2.60)                  | 3.39*** (2.55-4.51)                                                 | 0.70* (0.50-0.97)                                              | 1.32 (0.99-1.76)                                                                 | 2.19*** (1.66-2.88)                                                    | 3.68*** (2.99-4.53)                                               |
| Burned self                                                                                                                                        | 1.27 (0.72-2.22)                     | 2.38** (1.43-3.97)                                                  | 0.60* (0.37-0.99)                                              | 1.98* (1.17-3.35)                                                                | 2.39*** (1.76-3.24)                                                    | 3.40*** (2.54-4.53)                                               |
| Bruised or pinched self                                                                                                                            | 1.18 (0.93-1.50)                     | 2.75*** (2.20-3.44)                                                 | 0.60*** (0.45-0.79)                                            | 0.94 (0.72-1.22)                                                                 | 1.69*** (1.33-2.15)                                                    | 2.71*** (2.26-3.24)                                               |
| Pulled out hair                                                                                                                                    | 1.82** (1.18-2.82)                   | 3.69*** (2.60-5.24)                                                 | 0.77 (0.49-1.19)                                               | 1.26 (0.85-1.85)                                                                 | 2.59*** (1.74-3.84)                                                    | 4.37*** (3.45-5.54)                                               |
| Hurt self some other way                                                                                                                           | 0.70 (0.45-1.08)                     | 2.43*** (1.62-3.68)                                                 | 0.40*** (0.24-0.66)                                            | 0.77 (0.46-1.31)                                                                 | 1.38 (0.89-2.15)                                                       | 3.45*** (2.47-4.81)                                               |
| Notes: * p<0.05, ** p<0.01, *** p<0.001                                                                                                            |                                      |                                                                     |                                                                |                                                                                  |                                                                        |                                                                   |
